# Supplementary material for: Epidemiology of influenza in pregnant women hospitalized with respiratory illness in Moscow, 2012/2013–2015/2016: a hospital-based active surveillance study
Source: Springer Nature journal article supplement (doi:10.1186/s12884-019-2192-z), 2019-02-15
Supplement: MOESM1 [file 16484752]

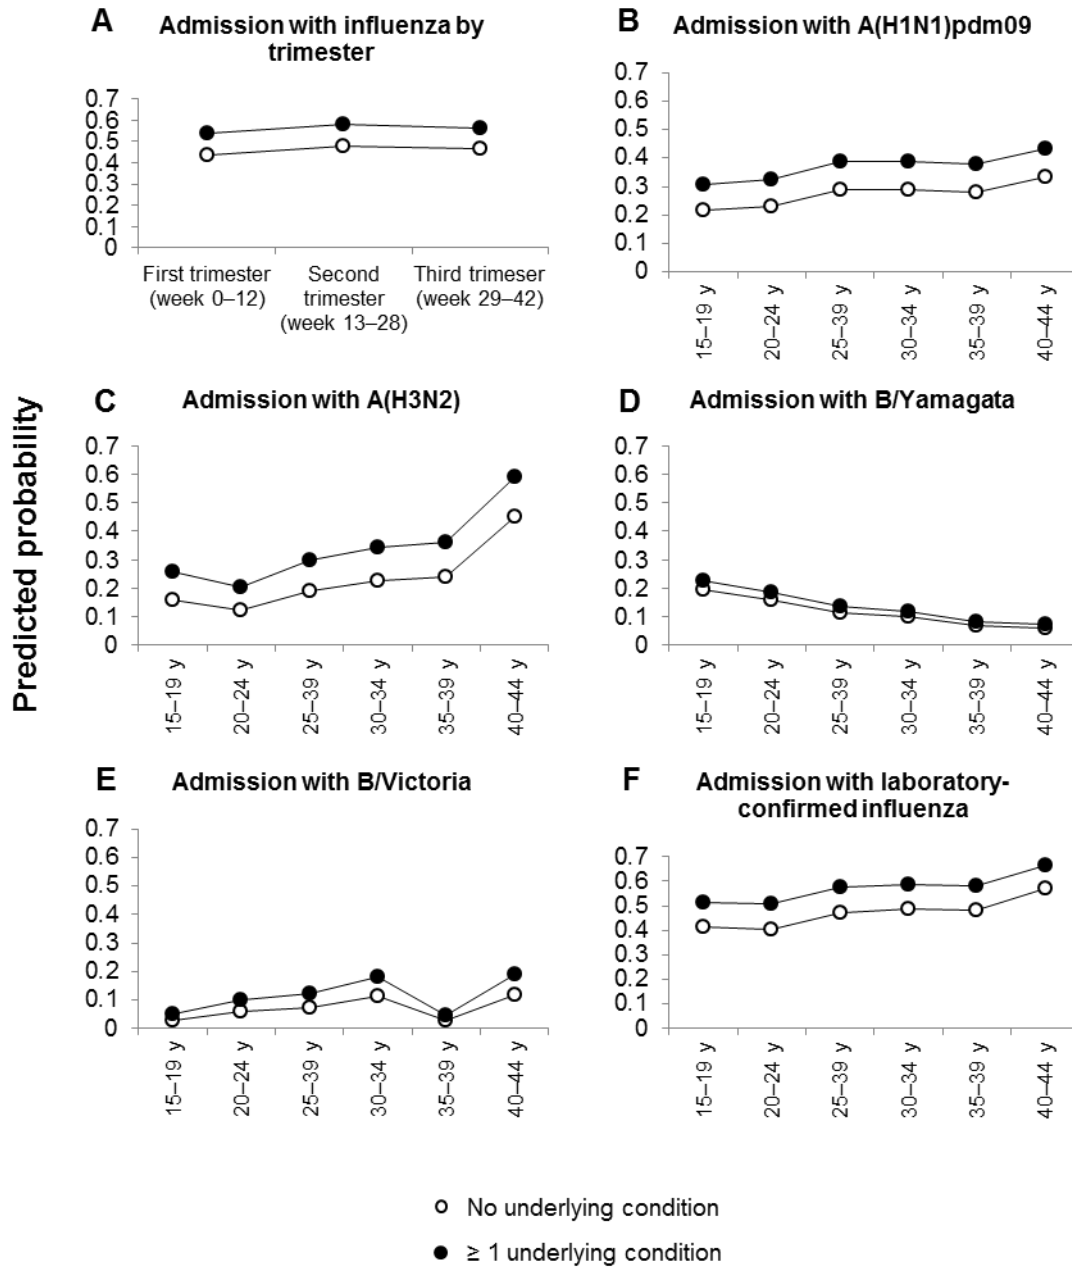

**Predicted probability of admission with influenza by (A) trimester, (B-E) subtype/lineage, and (F) overall according to age group and presence of underlying conditions.** Probabilities were adjusted by age (grouped in 5-year increments), smoking habits (yes/no), underlying conditions (yes/no), calendar time at admission (season-week) as splines (four knots), time from admission to swab in days (grouped), and admission during the previous 12 months (yes/no).
